# Supplementary material
Source: HighWire-hosted journal article supplement (https://www.rcpjournals.org/highwire/filestream/12768/field_highwire_adjunct_files/11/S9._Frequency_histogram_for_number_of_physical_health_symptoms_reported_by_patients_at_post-COVID_review.pdf)
Supplement: S9._Frequency_histogram_for_number_of_physical_health_symptoms_reported_by_patients_at_post-COVID_review.pdf [file S9._Frequency_histogram_for_number_of_physical_health_symptoms_reported_by_patients_at_post-COVID_review.pdf]

**Histogram of Symptoms in Admitted Patients**

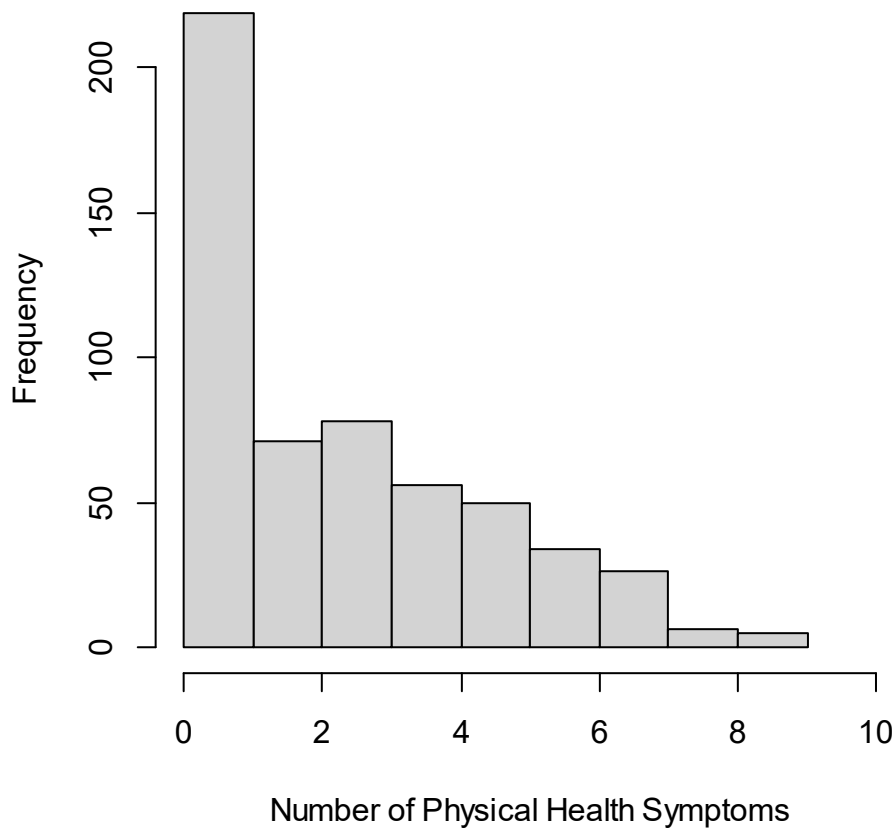

**S9. Frequency histogram for number of physical health symptoms reported by patients at post-COVID review following admission for COVID pneumonia.**

Numbers of patients (vertical axis) reporting different numbers of physical symptoms on the Amplitude Questionnaire (Symptom Score; horizontal axis).
